# Supplementary material for: Machine learning for maternal health: Predicting delivery location in a community health worker program in Zanzibar
Source: PubMed Central journal article supplement (PMC9428344; doi:10.3389/fdgth.2022.855236), 2022-08-17
Supplement: Data_Sheet_1_v2.pdf [file Data_Sheet_1_v2.pdf]

## Supplementary material for

### **Machine learning for maternal health: predicting delivery location in a community health worker program in Zanzibar**

Alma Fredriksson<sup>1</sup>, Isabel Fulcher<sup>1,2</sup>, Allyson Russell<sup>3</sup>, Tracey Li<sup>3</sup>, Samira Seif<sup>3</sup>, Bethany Hedt-Gauthier<sup>1,2</sup>

<sup>1</sup>Department of Biostatistics, Harvard T.H. Chan School of Public Health, Boston, USA.

<sup>2</sup>Department of Global Health and Social Medicine, Harvard Medical School, Boston, USA.

<sup>3</sup>D-tree International, Dar es Salaam, Tanzania.

#### **Acknowledgements**

We would like to thank the Zanzibar Ministry of Health for their collaboration in the *Uzazi Salama* and *Jamii ni Afya* programs.

#### **Conflict of interest**

The authors declare that the research was conducted in the absence of any commercial or financial relationships that could be construed as a potential conflict of interest.

## CONTENT

- 1. Further details regarding the Uzazi Salama program**
- 2. Further details regarding the socioeconomic predictors**
- 3. Further details regarding chi-square test to identify key predictors**
- 4. Further model performance metrics**

# 1. Further details regarding the Uzazi Salama program

Further detail regarding the distribution of new monthly enrollments, deliveries and program exits in the Uzazi Salama in Zanzibar is illustrated in *Supplementary Fig. 1*.

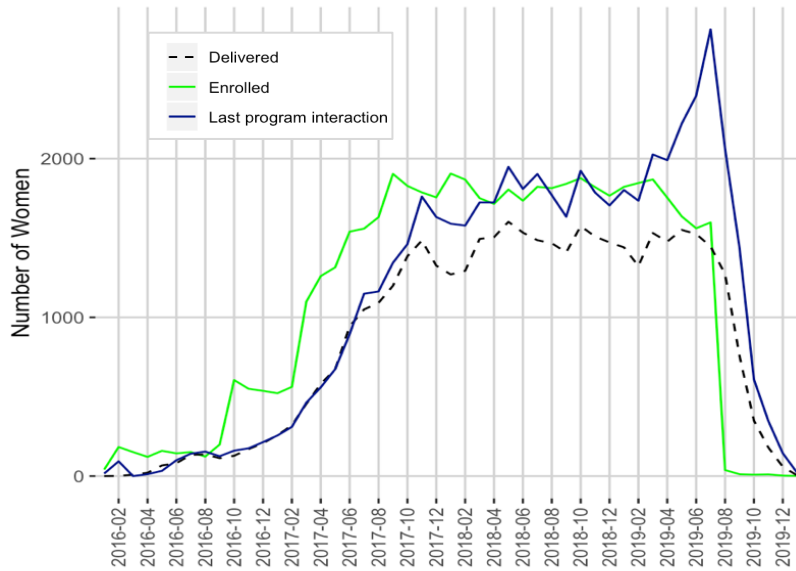

Supplementary Figure 1. *Distribution of new monthly enrollments, deliveries and program exits in the Uzazi Salama in Zanzibar.*

## 2. Further details regarding socioeconomic predictors

The analysis of each predictor's ability to individually discriminate between women who deliver in a health facility and women who deliver at home, presented in the *Results* section, suggests that socioeconomic indicators are important factors. *Supplementary Fig. 2* below illustrates the difference in socioeconomic distribution between women who deliver in a health facility and women who deliver at home.

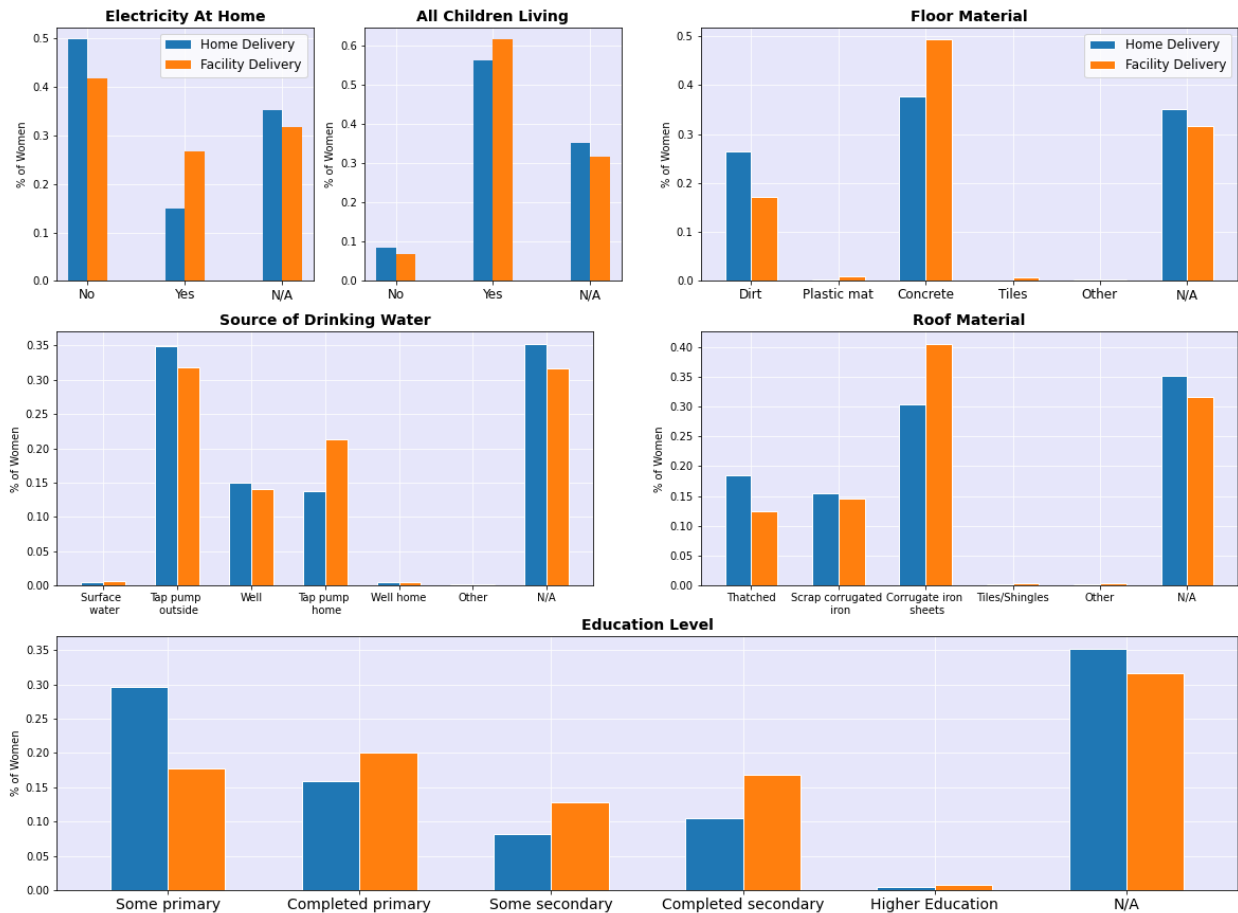

*Supplementary Figure 2. Distribution of facility and non-facility deliveries across socioeconomic indicators*

### 3. Further details regarding chi-square test to identify key predictors

Further detail regarding the outcome distribution across key predictors and their corresponding  $\chi^2$ -statistic is provided in *Supp. Table 1*.

*Supplementary Table 1. Demographic and programmatic characteristics by delivery location (N=38,787)*

| VARIABLE                                                                               | HEALTH FACILITY DELIVERY<br>N (PROPORTION OF TOTAL WOMEN IN CATEGORY) | $\chi^2$ STATISTIC | P-VALUE |
|----------------------------------------------------------------------------------------|-----------------------------------------------------------------------|--------------------|---------|
| <b>Overall</b>                                                                         | 29679 (76.5%)                                                         |                    |         |
| <b>Previous delivery location</b>                                                      |                                                                       | 4580.1             | <0.001  |
| At home/in community                                                                   | 3841 (48.3%)                                                          |                    |         |
| On the way to health facility                                                          | 202 (59.8%)                                                           |                    |         |
| Health facility                                                                        | 17853 (83.0%)                                                         |                    |         |
| No previous delivery                                                                   | 7730 (86.7%)                                                          |                    |         |
| <b>Rate of facility delivery among women with same CHW</b>                             |                                                                       | 4407.7             | <0.001  |
| Q1 (2 - 58.1%]                                                                         | 4796 (54.1%)                                                          |                    |         |
| Q2 (58.1 – 77.6%]                                                                      | 6729 (75.9%)                                                          |                    |         |
| Q3 (77.6 - 91.3%]                                                                      | 7726 (86.8%)                                                          |                    |         |
| Q4 (91.3 - 100%]                                                                       | 8201 (92.7%)                                                          |                    |         |
| <b>Rate of facility delivery among women in same shehia</b>                            |                                                                       | 4265.1             | <0.001  |
| Q1 (7.2 - 58.3%]                                                                       | 4918 (54.1%)                                                          |                    |         |
| Q2 (58.3 – 77.8%]                                                                      | 6922 (76.3%)                                                          |                    |         |
| Q3 (77.8 - 88.7%]                                                                      | 7742 (85.7%)                                                          |                    |         |
| Q4 (88.7 - 100%]                                                                       | 8350 (92.2%)                                                          |                    |         |
| <b>Name of Delivery Facility</b><br>List of specific facilities omitted due to length. |                                                                       | 2370.6             | <0.001  |
| <b>District</b>                                                                        |                                                                       | 2298.4             | <0.001  |
| Kaskazini A                                                                            | 4333 (74.7%)                                                          |                    |         |
| Kaskazini B                                                                            | 2458 (86.8%)                                                          |                    |         |
| Kati                                                                                   | 2874 (81.4%)                                                          |                    |         |
| Magharibi                                                                              | 4291 (88.4%)                                                          |                    |         |
| Kusini                                                                                 | 1791 (96.2%)                                                          |                    |         |
| Mkoani                                                                                 | 3686 (60.1%)                                                          |                    |         |
| Wete                                                                                   | 3015 (77.0%)                                                          |                    |         |
| Micheweni                                                                              | 2910 (65.1%)                                                          |                    |         |
| Chake Chake                                                                            | 4321 (80.2%)                                                          |                    |         |
| <b>Parity</b>                                                                          |                                                                       | 954.9              | <0.001  |
| 0                                                                                      | 7730 (86.7%)                                                          |                    |         |
| 1                                                                                      | 5183 (78.0%)                                                          |                    |         |
| 2-4                                                                                    | 11241 (75.0%)                                                         |                    |         |
| 5+                                                                                     | 5470 (67.0%)                                                          |                    |         |
| <b>Education level</b>                                                                 |                                                                       | 867.9              | <0.001  |
| Some primary                                                                           | 5291 (66.2%)                                                          |                    |         |
| Completed primary                                                                      | 5939 (80.6%)                                                          |                    |         |
| Some secondary                                                                         | 3806 (83.5%)                                                          |                    |         |
| Completed secondary                                                                    | 4982 (83.9%)                                                          |                    |         |
| Higher education                                                                       | 245 (85.1%)                                                           |                    |         |
| <b>Floor material</b>                                                                  |                                                                       | 623.3              | <0.001  |

|                                          |               |       |        |
|------------------------------------------|---------------|-------|--------|
| Dirt                                     | 5093 (67.6%)  |       |        |
| Plastic mat                              | 259 (91.8%)   |       |        |
| Concrete                                 | 14640 (81.2%) |       |        |
| Tiles                                    | 198 (91.2%)   |       |        |
| Other                                    | 73 (79.3%)    |       |        |
| <b>Electricity in home</b>               |               | 508.6 | <0.001 |
| Yes                                      | 7908 (85.4%)  |       |        |
| No                                       | 12355 (73.2%) |       |        |
| <b>Fee at first ANC visit (shilling)</b> |               | 414.8 | <0.001 |
| Q1 (0 – 1,000]                           | 2917 (67.6%)  |       |        |
| Q2 (1,000 – 2,000]                       | 1206 (82.3%)  |       |        |
| Q3 (2,000 – 3,000]                       | 3241 (80.9%)  |       |        |
| Q4 (3,000 – 10,000]                      | 4833 (83.5%)  |       |        |

#### 4. Further model performance metrics

Table 3 presents the true positive rate, true negative rate, overall accuracy and AUC of each of the trained models. *Supplementary Table 3* provides additional detail on the false positive rate, women predicted to deliver at home who actually delivered in a health facility, and false negative rate, women who were predicted to deliver at a health facility, but delivered at home.

*Supplementary Table 3. Additional metrics for model performance on test set by training set type.*

| <b>TRAINING SET</b>                                          | <b>CLASSIFIER</b>    | <b>FALSE POSITIVE RATE</b> | <b>FALSE NEGATIVE RATE</b> |
|--------------------------------------------------------------|----------------------|----------------------------|----------------------------|
| <b>Undersampled<br/>N=14,572</b>                             | Logistic             | 28.3%                      | 26.0%                      |
|                                                              | Regularized Logistic | 29.0%                      | 25.5%                      |
|                                                              | Random Forest        | 25.6%                      | 28.2%                      |
|                                                              | Neural Network       | 44.9%                      | 19.7%                      |
| <b>Oversampled<br/>N = 47,486</b>                            | Logistic             | 28.9%                      | 25.5%                      |
|                                                              | Regularized Logistic | 29.0%                      | 25.4%                      |
|                                                              | Random Forest        | 28.9%                      | 26.2%                      |
|                                                              | Neural Network       | 24.9%                      | 34.1%                      |
| <b>SMOTE<br/>with minor<br/>undersampling<br/>N = 30,000</b> | Logistic             | 28.2%                      | 26.0%                      |
|                                                              | Regularized Logistic | 28.9%                      | 25.5%                      |
|                                                              | Random Forest        | 31.4%                      | 23.5%                      |
|                                                              | Neural Network       | 41.1%                      | 19.2%                      |
